# Supplementary material for: Late Glacial to Holocene environments in the present-day coldest region of the Northern Hemisphere inferred from a pollen record of Lake Billyakh, Verkhoyansk Mts, NE Siberia
Source: Copernicus journal article supplement (doi:10.5194/cp-5-73-2009), 2009-03-06
Supplement: Supplementary file 1 [file cp-5-73-2009-supplement.xls]

## Sheet: appendix
Appendix A: Results of the pollen analysis of the PG1756 core from Lake Billyakh (65°17'N, 126°47'E; 340 m a.s.l.); absolute values
Core depth (cm)	Age, cal. yr BP	Betula sect. Albae	Pinus subgen. Diploxylon	Picea	Pinaceae	Abies	Larix	Duschekia fruticosa	Betula sect. Nanae	Salix	Pinus subgen. Haploxylon	Juniperus	Ephedra	Cyperaceae	Poaceae	Apiaceae	Armeria	Artemisia	Asteraceae subfam. Asterioidae ind.	A. subfam. A. Matricaria	A. subfam. A. Saussurea	A. subfam. A. Senecio	Asteraceae subfam. Cichorioideae	Brassicaceae	Caryophyllaceae ind.	C. Cerastium	C. Minuartia	C. Stellaria holostea	Chenopodiaceae	Circaea	Epilobium	Ericales ind.	Ericaceae Empetrum	Ericaceae Vaccinium	Fabaceae	Indeterminate	Knautia	Lamiaceae	Liliaceae	Papaveraceae	Plantago	Polemonium	Polygonaceae ind.	Polygonum bistorta	P. viviparum	Rumex ind.	Rumex aquatilis	Primulaceae	Ranunculaceae
1	7.2605	3	120	50			17	54	180	5	9			17	31			4											2		1			2		4
25	215.472	2	139	9	3		8	25	235	3	34			66	51		1						1		1						1	6		1									1						4
30	267.057	59	98	12			5	79	211	5	12	1		35	30		1	6					1	2	1								7	5		2	1			1									1
35	321.471	5	63	5			7	48	255	2	12			87	61			1		1			1	1	2						2	6	1	1		1													7
45	438.79		107	18			44	50	349	4	28			83	57			7				2	2		4						1	12	3			5													7
60	635.994	9	61	19			6	57	219	10	21			39	58		2	1						1	3	1							5	2		2								1					1
65	707.389	3	73	12	2		6	68	226	9	9			27	35		3	1				1			1						1	1				1													2
70	781.613		125	5			11	71	334	3	8			44	73			1							5				1		2	14				1													2
75	858.668	4	101	16	11		10	37	231	4	10			57	43			1				1	1		2			1			2	4			1	1				1									3
80	938.552	1	133	6			9	67	340	5	5			62	37			4				2			2							16	2	1	1	2													8
85	1021.27		100	12			16	67	203	3	3			72	36			2		1			2		5				2		1	7	3		1	1							1					1	6
90	1106.81		154	13			14	73	223	6	10			35	42			2				1	1	1	3			2			1	7
95	1195.19		107	8			6	71	237	4	9			35	33			2		1					1							5																	6
100	1286.39	6	46	14	11		3	120	273	11	4			44	35			6							1									3		3				1
105	1380.42		117	9			9	38	250	4	7			75	40			2			1				3				1			12	1			2													2
110	1477.29	1	184	8			15	73	312	8	13			59	38			2							1				1			8				1													3
120	1679.51		123	2			4	91	246	6	3			31	20			3							1						1	6		1															2
125	1784.86		184	6			11	44	243	3	3			45	23		2	1					1		3						1	4		1		1							1						2
130	1893.05	3	186	29		1	24	30	195	3	6			29	24								1		3							4				1													4
135	2004.06		151	6			10	80	242	6	1			29	30			1							3							6	1	1		3											1		3
140	2117.91	2	191	6			13	106	349	7	11			42	33			4					1					3	1		1	9	3			1													2
145	2234.58		160	6			11	35	233	4	5			62	39			1					2									2		4												1	1
150	2354.09	9	113	90	1		25	20	172	4	4			48	22			3																2															1
155	2476.42		155	3			10	43	305	4	1			40	26	1		4							2				1			3		3	1											2		1	1
160	2601.58	2	220	2			9	64	299	5	7			24	23			4							3				1			6		1		1				3			1						1
165	2729.58		140	5			6	49	235	5	3			58	26			2					1		1			1	1		2	3		3		2													3
170	2860.4	7	175	24			61	40	307	5	33			62	42			5			1				1						1	3				2						1							2
175	2994.06		151	5			16	67	318	11	13			48	23			2				1			1							4		1		1							1						4
185	3269.86		119	4			7	67	301	10	1			58	42								2	1	2				1		1	3		2		1													6
190	3412		126	101		1	7	43	266	3	2			44	22			3				1	1		5				2		2	1		2	1	3
194	3527.75		88	4			11	43	224	5	2			74	91								1		4				1		1			6									1					2	1
195	3556.98		109	7			4	91	309	4	8			32	19			9					1		4			1				3		1		1													1
200	3704.78	4	188	12	2		22	35	270	3	9			41	36										2						1	1	2	1		2												1	3
204	3825.06	6	177	31			27	33	324	1	13			24	19			6							3							4											3						2
209	3977.96	2	123	7			4	80	331	6	2			39	32			2				2	1	1							1	3			2	2													6
214	4133.69		69	6				59	392	6				20	16			6					2		1									1															1
219	4292.25	1	150	2			10	58	332	6				33	31			1			1	1		1	2			1				3				1							1						2
224	4453.64	2	154	25			38	32	320	3	22			19	24			2							2						2	2		1
229	4617.85		170	7			25	65	306	6	7			37	65			2					1	1	2							6		4		3							1						8
234	4784.9	1	118	8			3	79	360	9	11			34	24			3					1		1				1			2											2
239	4954.78		125	5			6	56	321	7	2			38	34			3					1							1	1	6		3		2													2
244	5127.49	2	132	35			23	46	285	6	28			16	18		2	2					2								1	4				1													4
249	5303.03		142	11			11	72	310	8	4			27	34			2					1		2							1																	4
264	5846.62		74	38	1		22	78	376	5	13			19	46		2						1		5				1			8				2							2
269	6033.48		153	5			8	36	310	7			1	24	25							1	3		2							2		4		1													4
279	6415.69		53	5			4	51	354	11	6			25	39			3		1			1		2				1			3				2													3
284	6611.04	1	112	17			22	34	266		12			16	30							1	1		4						1	7		1															4
289	6809.22		93	8			7	41	325	5				24	28		1								1									1		2													2
294	7010.22	2	13	37		10	4	51	461	12				35	25			2					1		1									1		1								1
299	7214.06		35	4	1		12	57	385	3	1			35	42			1				1	2		1				1		1	1				3													3
304	7420.73		35	39			10	42	412	3	1			31	28			8					1		4							4		2		2
309	7630.23		40	13			17	41	352	7				43	40			5			1	1	1		3							6		2		1													5
314	7842.56		2	3			8	102	621	7	19		1	54	35			4	1				1	3	1				1			3	2	2		3													2
319	8057.72		22	1			5	44	408	4				36	47			2			1		1		1									1		3													1
324	8275.71	1	2	33			9	45	459		11			18	30			4				2									1	3		1									1						1
329	8496.52		10	9			10	45	365	3				51	58								2		5			2				6		2				1					1						7
334	8720.17	13	2	4			4	53	530	5				42	30			5				1	2	2							1		2	1		1
339	8946.65		4	11			9	80	401	4				16	40			2			1											5		5															1
344	9175.96			13			33	77	550	9	15			26	22		2	4							1				1			1				1													1
349	9408.1		7	1			6	40	461	1				12	20			1
354	9643.07						7	54	653	7	6		1	18	12		1	5											1			2	1			1
364	10121.5	1			1		4	30	663	5	4		1	7	27							1									2			1		1
369	10365		3					32	468	2				12	17		1																			1													1
374	10611.2	2			2		3	18	576	8				17	24		1	3			1			1	1						1		2	4						1
379	10860.4							16	554	4				7	30		1								1				1	1						1													1
384	11112.3						14	24	654	4	1			15	18			14						2	1							1			1	1													4
389	11367.1						4	167	367	3				24	113		2	5				1	1		2				1	1	1				1	1													7
394	11624.7	18					4	99	204	1	1			68	100			24				2			3			1	4					3		4		1
399	11885.1		1				3	179	174					109	131			11		1			1		6		1		2		3	3		2		2				1									20
404	12148.4	14			1			98	226	2	2			79	72			13				1	3	2	2				7		1			2		3		2							1				3
409	12414.5		2		1		2	115	208	4				88	70			18			1	2	2	1	7	1		1	3			3				1					1								8
414	12683.4	17			1		1	159	271	5				46	29			3					2					2	1		1					2													1
419	12955.2							15	300	1				136	70		1	13					4		3	1			6			5	1	8		6				1			1						3
424	13229.8				1		5	37	190	3				162	63			22				2	6		8				7			10		10		5		1											13
429	13507.2						3	1	9	2				261	159			11		1		3	7		27			8	9		1	7		1		9				2	4								28
434	13787.4						2	16	32	4				208	140	1	1	55		2			3		18				8			1		1		12		1		7			2						9
439	14070.5				1				4	1				306	137		1	21				5	9		15	1	1		2		1	1		2	1	6				3	1			3					18
444	14356.4		1				1	11	38	2	2			270	133			17		1	3	2	7		24	1		2	3			4				6		1					1	1					17
449	14645.2						2		2					305	157			24			1	1	9	1	24		1	2	1						1	2				1	1	1	3			1		1	23
454	14936.7				5		9	11	13	2		1		226	140	1		41				3	7	1	21	5		3	1		3	1	1			11		1		5			1					1	6
[truncated: 57 more columns]
